# Supplementary material for: Structure-based design of prefusion-stabilized human metapneumovirus fusion proteins
Source: PubMed Central journal article supplement (PMC8921277; doi:10.1038/s41467-022-28931-3), 2022-03-14
Supplement: 41467_2022_28931_MOESM1_ESM.pdf [file 41467_2022_28931_MOESM1_ESM.pdf]

## **SUPPLEMENTARY INFORMATION**

### **Structure-based design of prefusion-stabilized human metapneumovirus fusion proteins**

Ching-Lin Hsieh<sup>1</sup>, Scott A. Rush<sup>1</sup>, Concepcion Palomo<sup>2</sup>, Chia-Wei Chou<sup>1</sup>, Whitney Pickens<sup>1</sup>,  
Vicente Más<sup>2</sup>, Jason S. McLellan<sup>1</sup>

<sup>1</sup>Department of Molecular Biosciences, The University of Texas at Austin, Austin, Texas, USA

<sup>2</sup>Centro Nacional de Microbiología, Instituto de Salud Carlos III, Madrid, Spain,

\*Correspondence: [jmclellan@austin.utexas.edu](mailto:jmclellan@austin.utexas.edu) (J.S.M.)

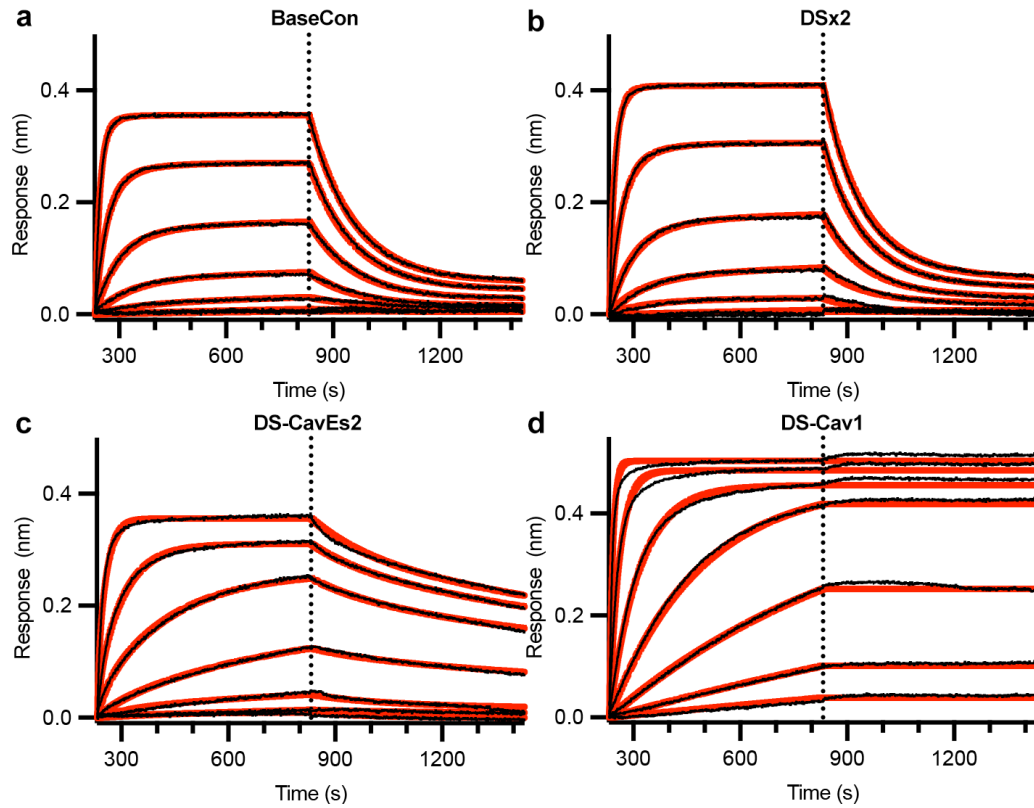

**Supplementary Figure 1 . The binding of MPE8 Fab to hMPV F variants and prefusion RSV F assessed by biolayer interferometry. (a–d)** Anti-foldon IgG was used to capture hMPV F variants (a) BaseCon, (b) DSx2 (c) DS-CavEs2 or (d) RSV F DS-Cav1 on anti-human Fc capture (AHC) biosensors, which were then dipped into different concentrations of MPE8 Fab solutions. Binding data are shown as black lines and the best fit to a (a–c) heterogenous ligand model or (d) 1:1 binding model is shown as red lines. Binding constants are shown in Table S2.

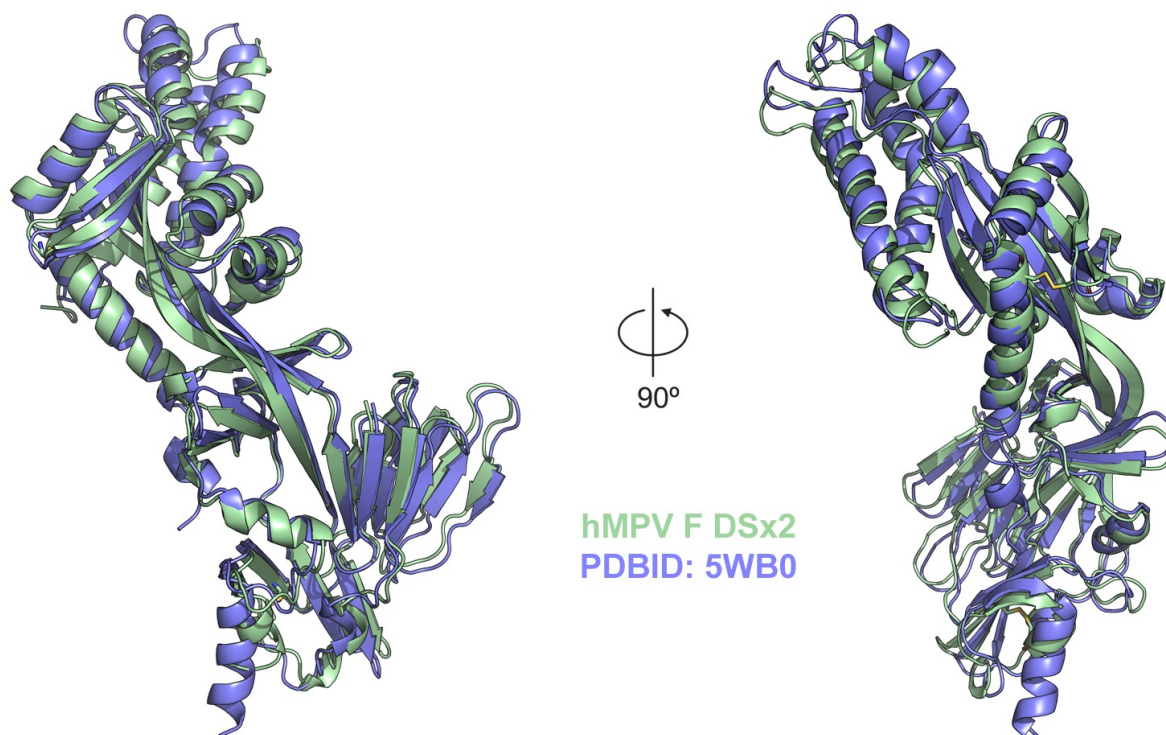

**Supplementary Figure 2. Superposition of hMPV F DSx2 and hMPV F 115-BV.** The crystal structure of hMPV F DSx2 + MPE8 (green) superimposed with a single protomer of the previously solved crystal structure of hMPV F in its prefusion conformation (PDBID: 5WB0; blue). MPE8 has been removed for clarity.

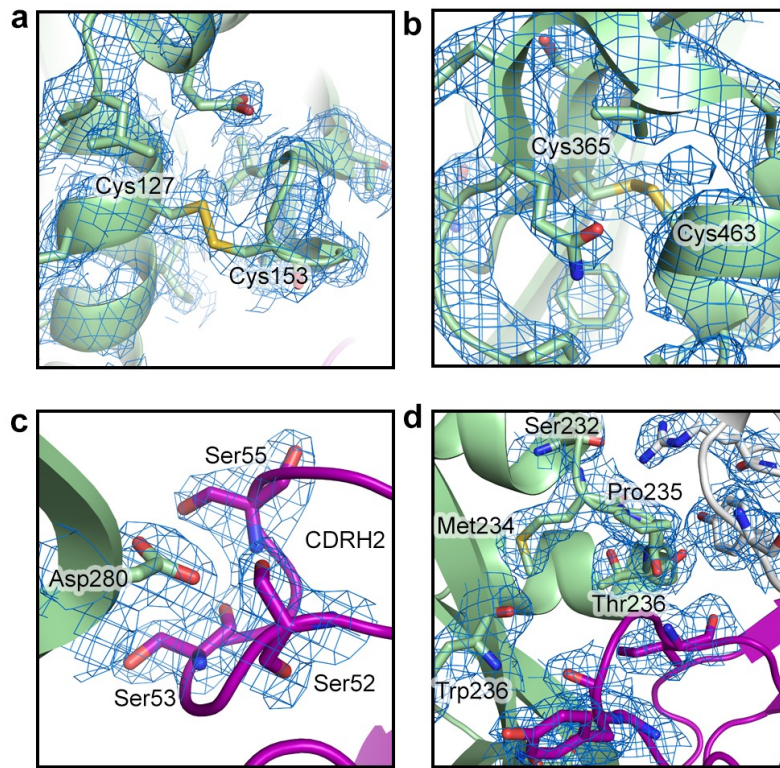

**Supplementary Figure 3. Electron density of stabilizing disulfides and interface residues in the DSx2 + MPE8 crystal structure.** (a, b) The introduced stabilizing disulfide substitutions of (a) T127C/N153C within antigenic site V and (b) T365C/V463C at HRB are shown on the prefusion hMPV F structure. (c) The hMPV F DSx2 (green) Asp280 interaction with MPE8 (purple) CDRH2 Ser52, Ser53, and Ser55 fit within the electron density. (d) A view of the hMPV F DSx2 (green) and MPE8 (heavy chain, purple; light chain, white) interface residues fit within the electron density. hMPV F DSx2 residues are labeled. The electron density ( $2F_o - F_c$ ) for each structure is shown as a blue mesh.

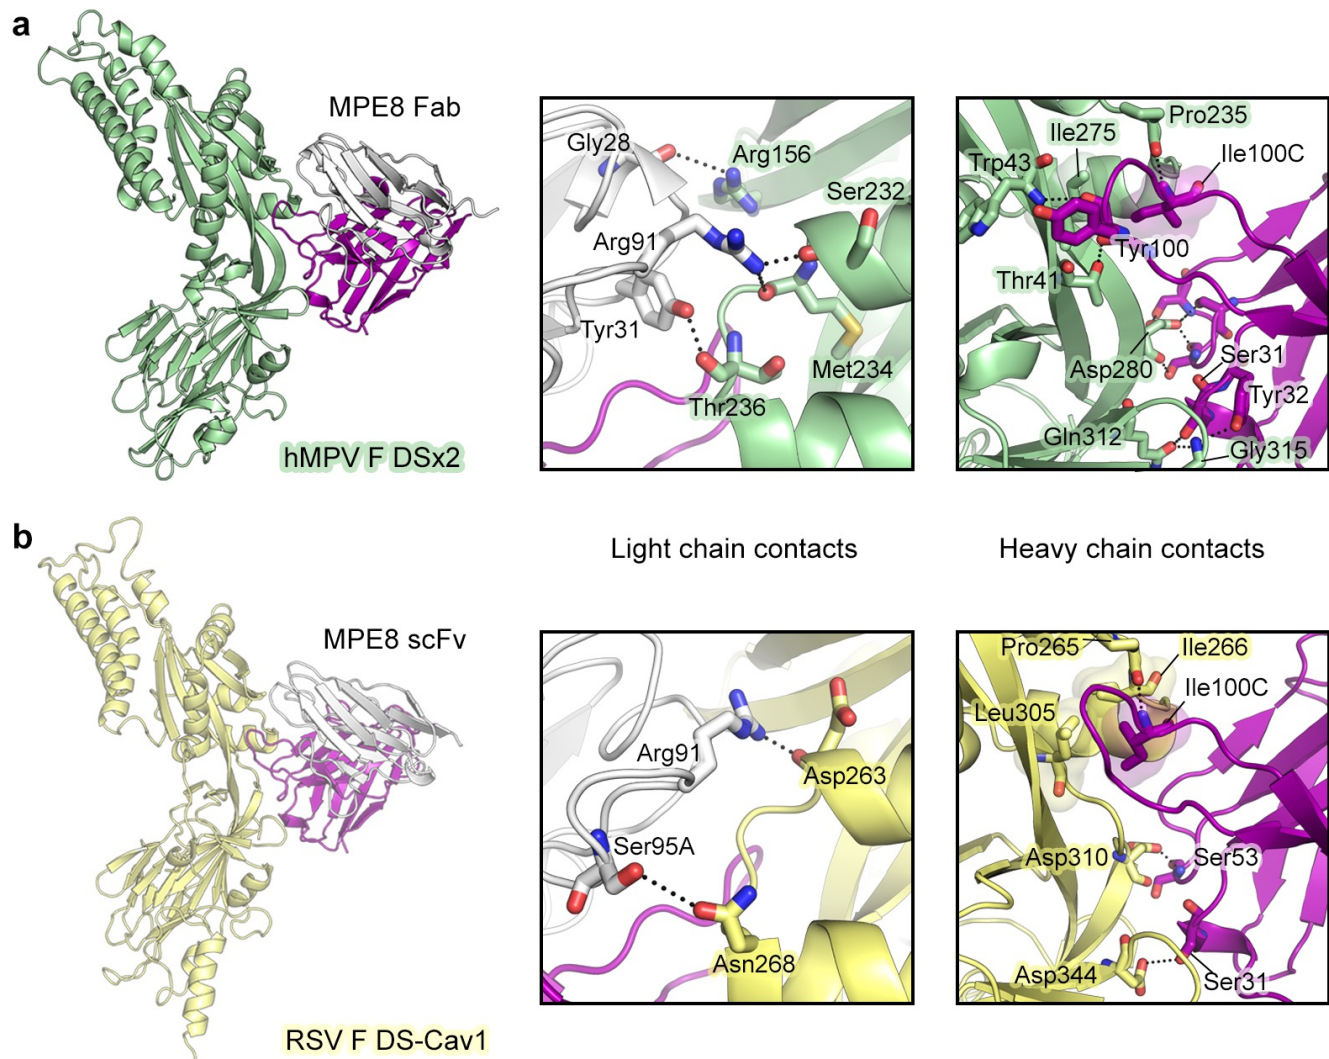

**Supplementary Figure 4. Structural comparison of MPE8 epitopes on hMPV F DSx2 and RSV F DS-Cav1.** (a, b) (left) Ribbon diagrams depicting the crystal structures of (a) hMPV F DSx2 bound to MPE8 Fab and (b) RSV F DS-Cav1 bound to MPE8 scFv (PDBID: 5U68). (middle) A zoomed in view showing the light chain contacts made between MPE8 and each F protein. (right) A zoomed in view showing the heavy chain contacts made between MPE8 and each F protein. Residues of interest are labeled and shown as a stick representation. Transparent surfaces around residues indicate hydrophobic interaction. Oxygen atoms are colored red and nitrogen atoms are colored blue. Black dotted lines indicate hydrogen bonds or salt bridges. Note that the MPE8 scFv used to determine the structure in (b) is a variant consisting of the predicted unmutated common ancestor (UCA) heavy-chain variable domain and the fully mature light-chain variable domain.

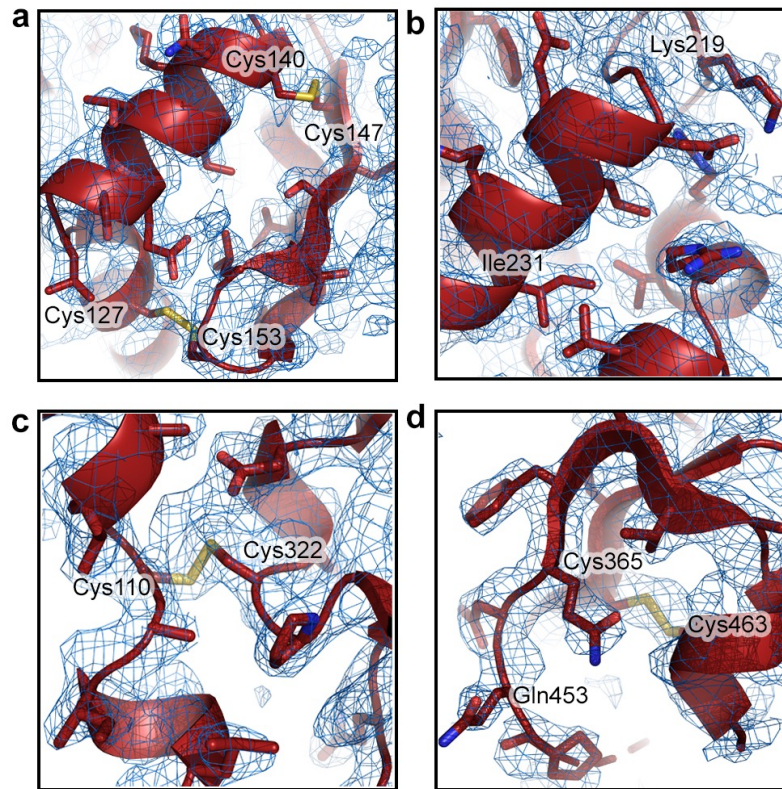

**Supplementary Figure 5. Electron density of the DS-CavEs2 stabilizing substitutions.** (a–d) The stabilizing substitutions are shown based on their locations in the prefusion hMPV F structure. The local secondary structures from (a) antigenic site V, (b) antigenic site II (c) fusion peptide and (d) HRB are shown as red ribbons, with stabilizing substitutions shown as sticks. The electron density (2Fo-Fc) for each structure is shown as a blue mesh. Oxygen atoms are colored red, nitrogen atoms blue, and sulfur atoms yellow.

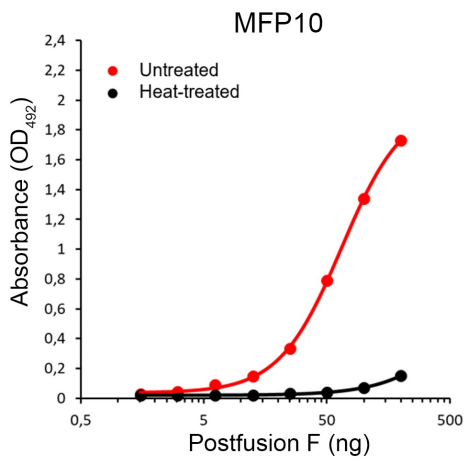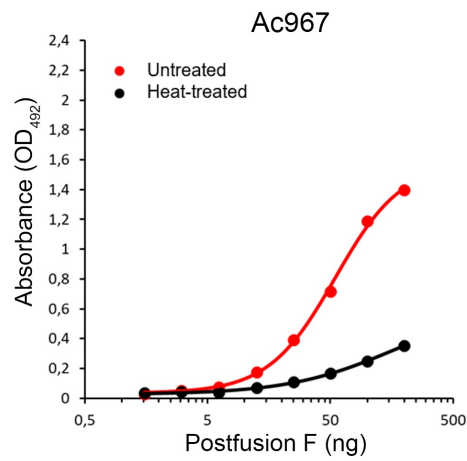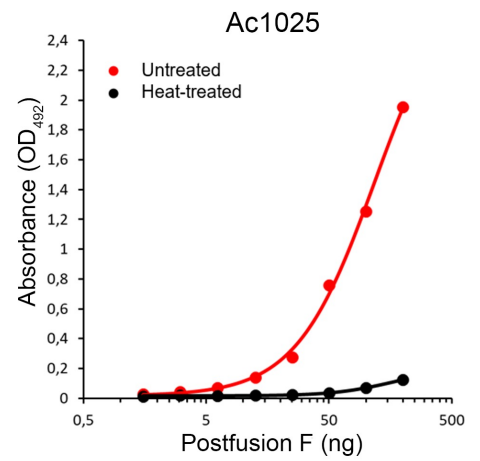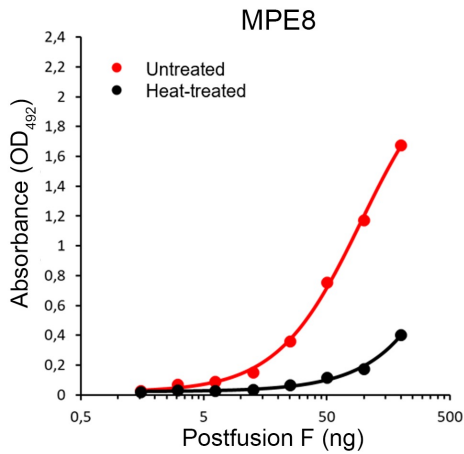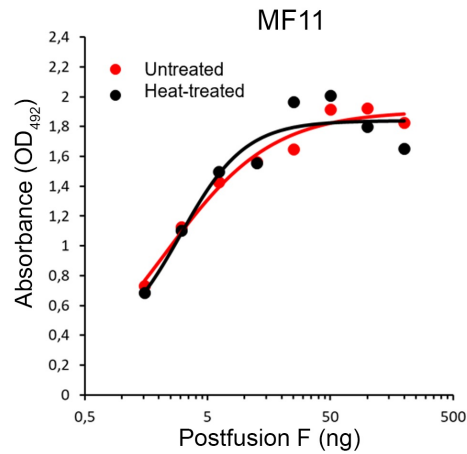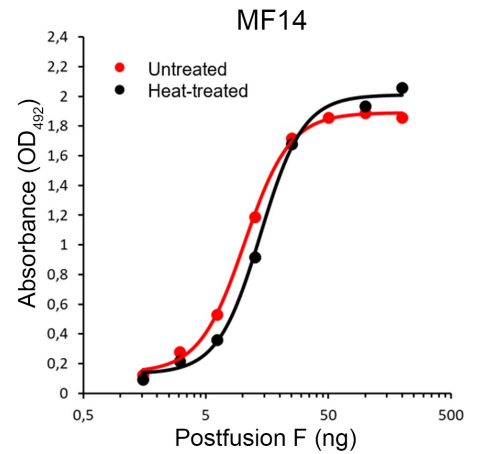

**Supplementary Figure 6. Heat treatment of postfusion hMPV F decreases binding to prefusion-specific antibodies.** ELISA binding of heat-treated or untreated postfusion hMPV F to prefusion-specific monoclonal antibodies (MFP10, Ac967, Ac1025 and MPE8) and antibodies recognizing antigenic site IV (MF11) and antigenic site II (MF14) assessed by ELISA.

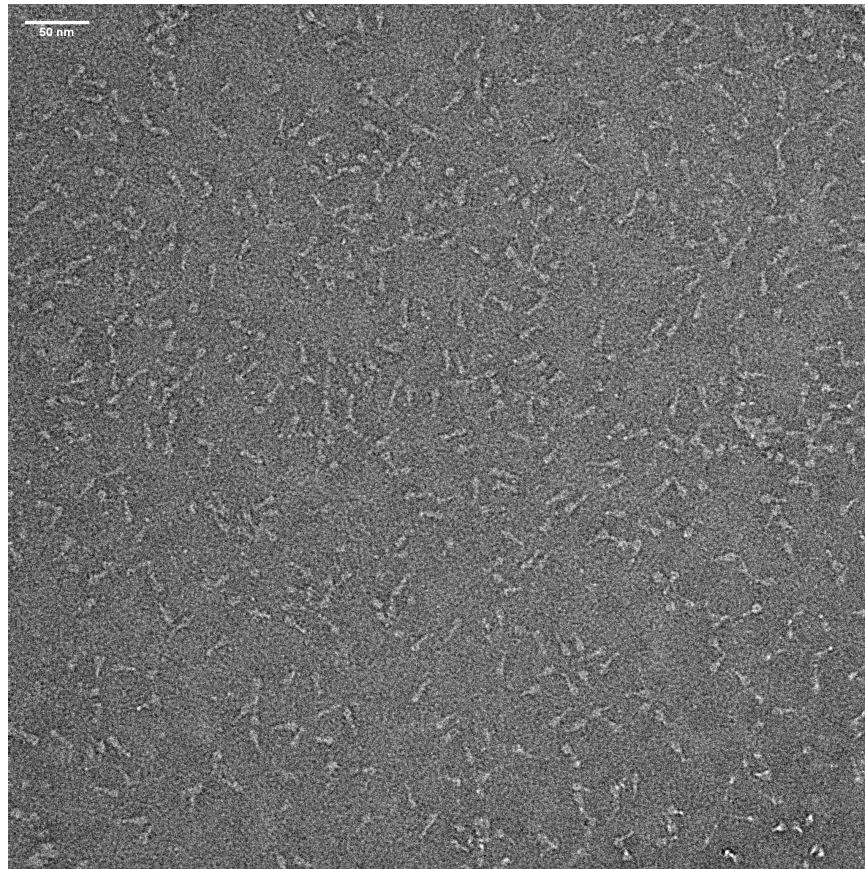

**Supplementary Figure 7. Representative micrograph of negatively stained postfusion hMPV F.** Micrograph of postfusion hMPV F after heat treatment to trigger any residual prefusion hMPV F to the postfusion conformation. A total of nine micrographs were taken from one EM grid.



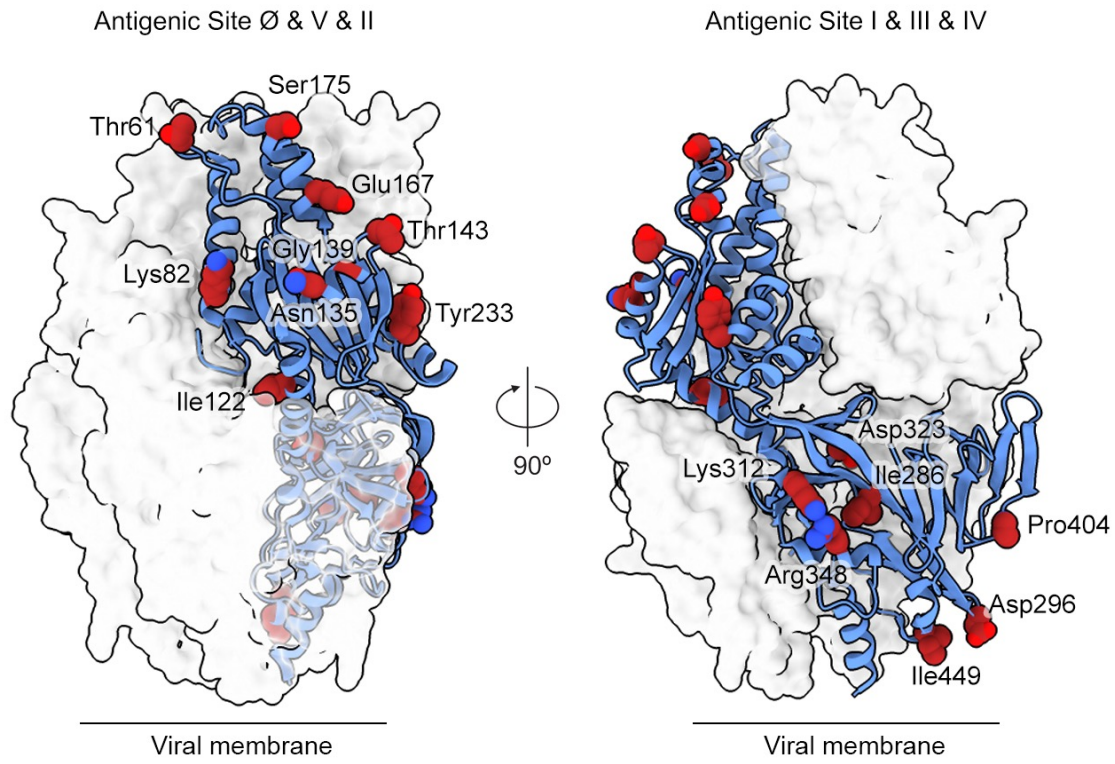

**Supplementary Figure 8. Mapping of divergent residues from subgroup B2 on the antigenic surface of subgroup A1 prefusion structure.** One hMPV F monomer is shown as a ribbon diagram with the divergent residues highlighted as spheres. The other two protomers are shown as a transparent molecular surface. Residue labels correspond to the B2 sequence.

**Supplementary Table 1. Expression and thermostability summary of hMPV F variants.**

| <b>Strategy</b> | <b>Substitution(s)</b> | <b>Fold change (%) in expression relative to BaseCon</b> | <b>Tm increase relative to BaseCon</b> |
|-----------------|------------------------|----------------------------------------------------------|----------------------------------------|
| Proline         | A86P                   | 40                                                       | ND                                     |
| Proline         | A107P                  | 287                                                      | ND                                     |
| Proline         | A113P                  | 190                                                      | ND                                     |
| Proline         | T114P                  | 77                                                       | ND                                     |
| Proline         | E146P                  | 250                                                      | ND                                     |
| Proline         | V148P                  | 82                                                       | ND                                     |
| Proline         | A344P                  | 200                                                      | ND                                     |
| Proline         | S443P                  | 0                                                        | ND                                     |
| Proline         | D461P                  | 178                                                      | ND                                     |
| Polar           | L66N                   | 70                                                       | ND                                     |
| Polar           | L73E                   | 152                                                      | ND                                     |
| Polar           | Q195K                  | 91                                                       | ND                                     |
| Polar           | L219K                  | 144                                                      | ND                                     |
| Polar           | E453Q                  | 193                                                      | ND                                     |
| Polar           | L66D/K188R             | 96                                                       | ND                                     |
| Polar           | H368R/D461E            | 229                                                      | ND                                     |
| Disulfide       | V104C/N457C            | 77                                                       | 5.7 °C                                 |
| Disulfide       | L110C/N322C            | 245                                                      | 4.6 °C                                 |
| Disulfide       | A116C/A338C            | 40                                                       | 4.6 °C                                 |
| Disulfide       | T127C/N153C            | 275                                                      | 2.3 °C                                 |
| Disulfide       | A140C/A147C            | 310                                                      | 1.1 °C                                 |
| Disulfide       | S291C/S443C            | 60                                                       | ND                                     |
| Disulfide       | T365C/V463C            | 172                                                      | 6.2 °C                                 |
| Cavity filling  | L105I                  | 65                                                       | ND                                     |
| Cavity filling  | L105F                  | 87                                                       | ND                                     |
| Cavity filling  | L105W                  | 132                                                      | ND                                     |

|                |             |     |    |
|----------------|-------------|-----|----|
| Cavity filling | V118F       | 28  | ND |
| Cavity filling | V118M       | 28  | ND |
| Cavity filling | V134I       | 87  | ND |
| Cavity filling | S149V/I137L | 152 | ND |
| Cavity filling | S149I       | 228 | ND |
| Cavity filling | L158W       | 137 | ND |
| Cavity filling | T160V       | 32  | ND |
| Cavity filling | L165F       | 37  | ND |
| Cavity filling | V169I       | 51  | ND |
| Cavity filling | V191I       | 84  | ND |
| Cavity filling | S194Q       | 108 | ND |
| Cavity filling | I217V       | 119 | ND |
| Cavity filling | V231I       | 266 | ND |
| Cavity filling | G366S       | 173 | ND |
| Cavity filling | S376T       | 151 | ND |
| Cavity filling | Q426W       | 47  | ND |

| <b>ID of combinatorial substitutions</b> | <b>Substitutions</b>                                  | <b>Fold change (%) in expression relative to BaseCon</b> | <b>Tm increase in relative to BaseCon</b> |
|------------------------------------------|-------------------------------------------------------|----------------------------------------------------------|-------------------------------------------|
| DSx2                                     | T127C/N153C/T365C/V463C                               | 206                                                      | 6.4 °C                                    |
| DSx2/L219K                               | T127C/N153C/L219K/T365C/V463C                         | 227                                                      | 7.0 °C                                    |
| DSx2/V231I                               | T127C/N153C/V231I/T365C/V463C                         | 350                                                      | 7.0 °C                                    |
| DS-CavEs                                 | T127C/N153C/L219K/V231I/T365C/V463C                   | 1006                                                     | 9.5 °C                                    |
| MM-1H                                    | L110C/T127C/N153C/L219K/V231I/N322C/T365C/N368H/V463C | 708                                                      | 14.0 °C                                   |
| MM-4H                                    | L110C/T127C/A140C/A147C/N153C/L219K/                  | 710                                                      | 15.0 °C                                   |

|           |                                                                                     |     |         |
|-----------|-------------------------------------------------------------------------------------|-----|---------|
|           | V231I/N322C/T365C/N<br>368H/V463C                                                   |     |         |
| DS-CavEs2 | L110C/T127C/A140C/<br>A147C/N153C/L219K/<br>V231I/N322C/T365C/N<br>368H/E453Q/V463C | 996 | 18.0 °C |

---

ND, not determined.

**Supplementary Table 2. Binding kinetics by biolayer interferometry.**

| Protein                       | $K_D$ (M)               | $k_a$ (M <sup>-1</sup> s <sup>-1</sup> ) | $k_d$ (s <sup>-1</sup> ) |
|-------------------------------|-------------------------|------------------------------------------|--------------------------|
| hMPV F BaseCon <sup>a</sup>   | 3.30 x 10 <sup>-8</sup> | 2.45 x 10 <sup>5</sup>                   | 8.10 x 10 <sup>-3</sup>  |
|                               | < 1 x 10 <sup>-12</sup> | 1.05 x 10 <sup>5</sup>                   | < 1 x 10 <sup>-7</sup>   |
| hMPV F DSx2 <sup>a</sup>      | 4.22 x 10 <sup>-8</sup> | 2.16 x 10 <sup>5</sup>                   | 9.09 x 10 <sup>-3</sup>  |
|                               | 1.99 x 10 <sup>-9</sup> | 1.12 x 10 <sup>5</sup>                   | 2.22 x 10 <sup>-4</sup>  |
| hMPV F DS-CavEs2 <sup>a</sup> | 5.85 x 10 <sup>-9</sup> | 1.05 x 10 <sup>6</sup>                   | 6.16 x 10 <sup>-3</sup>  |
|                               | 3.45 x 10 <sup>-9</sup> | 1.37 x 10 <sup>5</sup>                   | 4.70 x 10 <sup>-4</sup>  |
| RSV F DS-Cav1 <sup>b</sup>    | < 1 x 10 <sup>-12</sup> | 3.60 x 10 <sup>5</sup>                   | < 1 x 10 <sup>-7</sup>   |

<sup>a</sup>Binding of MPE8 Fab to hMPV F variants is best fit into heterogenous ligand model.

<sup>b</sup>Binding of MPE8 Fab to RSV F DS-Cav1 is best fit into 1:1 binding model.

**Supplementary Table 3. Crystallographic data collection and refinement statistics.**

| PDB ID                                                  | hMPV F               | hMPV F                  |
|---------------------------------------------------------|----------------------|-------------------------|
|                                                         | DSx2 + MPE8          | DS-CavEs2               |
|                                                         | 7SEM                 | 7SEJ                    |
| <b>Data collection</b>                                  |                      |                         |
| Space group                                             | <i>P</i> 2           | <i>P</i> 2 <sub>1</sub> |
| Cell constants                                          |                      |                         |
| <i>a</i> , <i>b</i> , <i>c</i> (Å)                      | 68.2, 45.6, 176.3    | 58.4, 105.8, 91.0       |
| $\alpha$ , $\beta$ , $\gamma$ (°)                       | 90, 94.2, 90         | 90, 105.3, 90           |
| Wavelength (Å)                                          | 0.9792               | 0.9792                  |
| Resolution (Å)                                          | 44.0–2.2 (2.26–2.20) | 45.3–2.5 (2.61–2.51)    |
| Total reflections                                       | 171,865 (14,491)     | 114,529 (13,247)        |
| Unique reflections                                      | 54,115 (4,437)       | 35,650 (4,043)          |
| <i>R</i> <sub>merge</sub>                               | 0.060 (0.548)        | 0.078(0.349)            |
| <i>R</i> <sub>pim</sub>                                 | 0.057 (0.542)        | 0.073 (0.321)           |
| <i>I</i> / $\sigma$ <i>I</i>                            | 9.3 (1.8)            | 8.3 (3.0)               |
| CC <sub>1/2</sub>                                       | 0.997 (0.693)        | 0.994 (0.804)           |
| Completeness (%)                                        | 97.6 (98.2)          | 97.6 (98.2)             |
| Redundancy                                              | 3.2 (3.3)            | 3.2 (3.3)               |
| <b>Refinement</b>                                       |                      |                         |
| Resolution (Å)                                          | 44.0–2.2 (2.24–2.20) | 45.3–2.5 (2.58–2.51)    |
| Unique reflections                                      | 54,073               | 35,616                  |
| <i>R</i> <sub>work</sub> / <i>R</i> <sub>free</sub> (%) | 21.7/23.9            | 20.9/25.2               |
| No. atoms                                               |                      |                         |
| Protein                                                 | 6,380                | 6,562                   |
| Glycan (NAG)                                            | 42                   | 56                      |
| Water                                                   | 173                  | 136                     |
| <i>B</i> -factors                                       |                      |                         |
| Protein                                                 | 60.5                 | 42.7                    |
| Glycan (NAG)                                            | 76.3                 | 57.5                    |
| Water                                                   | 46.2                 | 38.4                    |
| R.m.s. deviations                                       |                      |                         |
| Bond lengths (Å)                                        | 0.008                | 0.005                   |
| Bond angles (°)                                         | 1.11                 | 0.70                    |
| Ramachandran                                            |                      |                         |
| Favored (%)                                             | 95.1                 | 97.1                    |
| Allowed (%)                                             | 4.9                  | 2.8                     |
| Outliers (%)                                            | 0.0                  | 0.1                     |

Values in parentheses are for the highest-resolution shell.
